# Supplementary material for: Long-Term Satisfaction and Patient-Centered Outcomes of Deep Brain Stimulation in Parkinson’s Disease
Source: Brain Sci. 2018 Apr 1;8(4):60. doi: 10.3390/brainsci8040060 (PMC5924396; doi:10.3390/brainsci8040060)
Supplement: Supplementary file 1 [file brainsci-08-00060-s001.pdf]

**Table S1.** Correlation of Change in Reported Symptom and Satisfaction

| Symptom                      | Spearman Correlation Coefficient | p-value |
|------------------------------|----------------------------------|---------|
| Dyskinesia                   | 0.22                             | 0.13    |
| Motor fluctuations           | 0.27                             | 0.051   |
| Tremor                       | 0.20                             | 0.16    |
| Rigidity                     | 0.29                             | 0.04    |
| Bradykinesia                 | 0.30                             | 0.03    |
| Gait difficulties            | 0.26                             | 0.07    |
| Balance, falling             | 0.12                             | 0.41    |
| Off-period dystonia          | 0.21                             | 0.13    |
| Cognitive impairment         | 0.09                             | 0.54    |
| Depression                   | 0.38                             | 0.01    |
| Apathy                       | 0.40                             | 0.003   |
| Insomnia                     | 0.43                             | 0.001   |
| Excessive daytime sleepiness | 0.16                             | 0.27    |
| Pain                         | 0.37                             | 0.01    |
| Medication side effects      | 0.13                             | 0.37    |

Correlation of change in symptoms from pre-DBS to current time (8.2±2.6 years post DBS) with current patient satisfaction. Worsened severity in symptoms correlated with lower satisfaction.

**Table S2.** Patient Reported Symptom Severity

| Symptom              | n (%)     |
|----------------------|-----------|
| Dyskinesia           |           |
| Better, n(%)         | 38 (73.1) |
| Did not change, n(%) | 10 (19.2) |
| Worse, n(%)          | 4 (7.7)   |
| Motor fluctuations   |           |
| Better               | 42 (80.8) |
| Did not change       | 7 (13.5)  |
| Worse                | 3 (5.8)   |
| Tremor               |           |
| Better               | 41 (78.9) |
| Did not change       | 9 (17.3)  |
| Worse                | 2 (3.9)   |
| Rigidity             |           |
| Better               | 33 (63.5) |
| Did not change       | 10 (19.2) |
| Worse                | 9 (17.3)  |
| Bradykinesia         |           |
| Better               | 24 (46.2) |
| Did not change       | 12 (23.1) |

|                              |           |
|------------------------------|-----------|
| Worse                        | 16 (30.8) |
| Gait difficulties            |           |
| Better                       | 23 (44.2) |
| Did not change               | 3 (5.8)   |
| Worse                        | 26 (50)   |
| Balance, falling             |           |
| Better                       | 13 (25)   |
| Did not change               | 5 (9.6)   |
| Worse                        | 34 (65.4) |
| Off-period dystonia          |           |
| Better                       | 19 (36.5) |
| Did not change               | 17 (32.7) |
| Worse                        | 16 (30.8) |
| Cognitive impairment         |           |
| Better                       | 7 (13.5)  |
| Did not change               | 18 (34.6) |
| Worse                        | 27 (51.9) |
| Depression                   |           |
| Better                       | 13 (25)   |
| Did not change               | 22 (42.3) |
| Worse                        | 17 (32.7) |
| Apathy                       |           |
| Better                       | 13 (25)   |
| Did not change               | 23 (44.2) |
| Worse                        | 16 (30.8) |
| Insomnia                     |           |
| Better                       | 16 (30.8) |
| Did not change               | 17 (32.7) |
| Worse                        | 19 (36.5) |
| Excessive daytime sleepiness |           |
| Better                       | 10 (19.2) |
| Did not change               | 20 (38.5) |
| Worse                        | 22 (42.3) |
| Pain                         |           |
| Better                       | 16 (30.8) |
| Did not change               | 20 (38.5) |
| Worse                        | 16 (30.8) |
| Medication side-effects      |           |
| Better                       | 27 (51.9) |
| Did not change               | 20 (38.5) |
| Worse                        | 5 (9.6)   |

Patients reported improvement, no change and worsening of motor and non-motor symptoms at two time points (pre-operatively and at the current time of 8.2±2.6 years post DBS).

**Table S3.** Locally developed DBS patient centered outcome questionnaire (RUSH-DBS-Q)

| Symptoms                     | Spearman correlation coefficient | p-value |
|------------------------------|----------------------------------|---------|
| Dyskinesia                   | 0.22                             | 0.13    |
| Motor fluctuations           | 0.27                             | 0.051   |
| Tremor                       | 0.20                             | 0.16    |
| Rigidity                     | 0.29                             | 0.04    |
| Bradykinesia                 | 0.30                             | 0.03    |
| Gait difficulties            | 0.26                             | 0.07    |
| Balance, falling             | 0.12                             | 0.41    |
| Off-period dystonia          | 0.21                             | 0.13    |
| Cognitive impairment         | 0.09                             | 0.54    |
| Depression                   | 0.38                             | 0.01    |
| Apathy                       | 0.40                             | 0.003   |
| Insomnia                     | 0.43                             | 0.001   |
| Excessive daytime sleepiness | 0.16                             | 0.27    |
| Pain                         | 0.37                             | 0.01    |
| Medication side-effects      | 0.13                             | 0.37    |

Values represent Spearman correlation coefficients. Correlation of change in symptoms from pre-DBS to current time ( $8.2 \pm 2.6$  years post DBS) with current patient satisfaction. Worsened severity in symptoms correlated with lower satisfaction.

**Table S4.** Correlation of Baseline Motor Scores and Satisfaction

| UPDRS-III Pre-DBS sub-scales     | Spearman Correlation Coefficient | p-value |
|----------------------------------|----------------------------------|---------|
| UPDRS-III-axial-ON               | 0.14                             | 0.33    |
| UPDRS-III-axial-OFF              | 0.08                             | 0.59    |
| UPDRS-III-tremor-resting-ON      | -0.11                            | 0.46    |
| UPDRS-III-tremor-resting-OFF     | -0.06                            | 0.68    |
| UPDRS-III-tremor-postural-ON     | -0.15                            | 0.3     |
| UPDRS-III-tremor-postural-OFF    | 0.09                             | 0.54    |
| UPDRS-III-bradykinesia-left-ON   | 0.01                             | 0.95    |
| UPDRS-III-bradykinesia-left-OFF  | -0.14                            | 0.33    |
| UPDRS-III-bradykinesia-right-ON  | -0.06                            | 0.69    |
| UPDRS-III-bradykinesia-right-OFF | -0.12                            | 0.4     |
| UPDRS-III-rigidity-ON            | -0.02                            | 0.87    |
| UPDRS-III-rigidity-OFF           | 0.02                             | 0.9     |

Correlation of baseline UPDRS-III sub-scale scores and current patient satisfaction.

**Table S5.** Correlation of Reported Symptom Severity and Satisfaction.

| Symptom            | Spearman Correlation Coefficient | p-value |
|--------------------|----------------------------------|---------|
| Motor symptoms     | 0.36                             | 0.01    |
| Non-motor symptoms | 0.33                             | 0.02    |

Patients' reported total motor and non-motor scores (change from pre-DBS to current time of  $8.2 \pm 2.6$  years post DBS) from the RUSH-DBS-Q were correlated to patient satisfaction.
